# Supplementary material for: G1 Interacts with OsMADS1 to Regulate the Development of the Sterile Lemma in Rice
Source: MDPI journal article supplement (doi:10.3390/plants13040505), 2024-02-11
Supplement: s1 [file s1]

**Table S1. Primers used in this study.**

| Use                  | Primer Name                         | Sequence (5' to 3')                                     |
|----------------------|-------------------------------------|---------------------------------------------------------|
| Complementation test | d35s: G1-GFP-F (SpeI)               | ggacagcccagatca <u>aactagt</u> ATGTCGTCGTCGTCCGCT       |
|                      | d35s: G1-GFP-R (BamHI)              | gcccttgctcaccat <u>ggatcc</u> ACTGAAGGTGTTGTACAGAAATGGC |
| Quantitative RT-PCR  | qRT-G1-F                            | CCGAGCCGGTACGAGTC                                       |
|                      | qRT-G1-R                            | TCGAGGTAGCGGAGGAACT                                     |
|                      | qRT-OsMADS1-F                       | GCTGCAACTACAACCTCACAGG                                  |
|                      | qRT-OsMADS1-R                       | TGATGGTGAGCATGAGGGTG                                    |
|                      | qRT-OsMADS34-F                      | CCAACTAGCGATGAGATGCAGAAC                                |
|                      | qRT-OsMADS34-R                      | AGCCAGTGGAGCTAAATCCTCAC                                 |
|                      | qRT-ACTIN-F                         | CCAAGGCCAATCGTGAGAAGA                                   |
|                      | qRT-ACTIN-R                         | AATCAGTGAGATCACGCCAG                                    |
| Yeast two-hybrid     | BD-G1-F (EcoRI)                     | atggccatggaggcc <u>gaattc</u> ATGTCGTCGTCGTCCGCTG       |
|                      | BD-G1-R (BamHI)                     | ccgctgcaggtcgac <u>ggatcc</u> CTAACTGAAGGTGTTGTACAGAAAT |
|                      | BD-G1 <sup>1-169</sup> -F (EcoRI)   | atggccatggaggcc <u>gaattc</u> ATGTCGTCGTCGTCCGCTG       |
|                      | BD-G1 <sup>1-169</sup> -R (BamHI)   | ccgctgcaggtcgac <u>ggatcc</u> GTCGCGGACGTCGCGCAGGT      |
|                      | BD-G1 <sup>22-276</sup> -F (EcoRI)  | atggccatggaggcc <u>gaattc</u> CCGAGCCGGTACGAGTCGCAGAA   |
|                      | BD-G1 <sup>22-276</sup> -R (BamHI)  | ccgctgcaggtcgac <u>ggatcc</u> CTAACTGAAGGTGTTGTACAGAAAT |
|                      | BD-G1 <sup>1-21</sup> -F (EcoRI)    | atggccatggaggcc <u>gaattc</u> ATGTCGTCGTCGTCCGCTG       |
|                      | BD-G1 <sup>1-21</sup> -R (BamHI)    | ccgctgcaggtcgac <u>ggatcc</u> CCGCAGCTCCGCCGGCGAG       |
|                      | BD-G1 <sup>22-169</sup> -F (EcoRI)  | atggccatggaggcc <u>gaattc</u> CCGAGCCGGTACGAGTCGCAGAA   |
|                      | BD-G1 <sup>22-169</sup> -R (BamHI)  | ccgctgcaggtcgac <u>ggatcc</u> GTCGCGGACGTCGCGCAGGT      |
|                      | BD-G1 <sup>170-276</sup> -F (EcoRI) | atggccatggaggcc <u>gaattc</u> GCGCAGGCCATGGCGCGC        |
|                      | BD-G1 <sup>170-276</sup> -R (BamHI) | ccgctgcaggtcgac <u>ggatcc</u> CTAACTGAAGGTGTTGTAC       |
|                      | BD-OsMADS1-F (EcoRI)                | atggccatggaggcc <u>gaattc</u> ATGGGGAGGGGGAAGGTG        |
|                      | BD-OsMADS1-R (BamHI)                | ccgctgcaggtcgac <u>ggatcc</u> TCATATCCAGCCGGATGGG       |
|                      | BD-OsMADS34-F (EcoRI)               | atggccatggaggcc <u>gaattc</u> ATGGGGCGAGGCAAGGTG        |
|                      | BD-OsMADS34-R (BamHI)               | ccgctgcaggtcgac <u>ggatcc</u> CTAGGCCATCCACTCAGGA       |
|                      | AD-G1-F (EcoRI)                     | gccatggaggccagt <u>gaattc</u> ATGTCGTCGTCGTCCGCTG       |

|                 |                             |                                                         |
|-----------------|-----------------------------|---------------------------------------------------------|
|                 | AD-G1-R (BamHI)             | cagctcgagctcgat <u>ggatcc</u> CTAACTGAAGGTGTTGTACAGAAAT |
|                 | AD-OsMADS1-F (EcoRI)        | gccatggaggccagtgaattcATGGGGAGGGGGAAGGTG                 |
|                 | AD-OsMADS1-R (BamHI)        | cagctcgagctcgat <u>ggatcc</u> TCATATCCAGCCGGATGGG       |
| BiFC assay      | cYFP/nYFP-G1-F (Sall)       | cttcgaattctgcagt <u>cgac</u> ATGTCGTCGTCGTCCGCTGC       |
|                 | cYFP/nYFP-G1-R (BamHI)      | actctagatcaggt <u>ggatcc</u> CTAACTGAAGGTGTTGTACAGAAAT  |
|                 | cYFP/nYFP-OsMADS1-F (Sall)  | cttcgaattctgcagt <u>cgac</u> ATGGGGAGGGGGAAGGTG         |
|                 | cYFP/nYFP-OsMADS1-R (BamHI) | actctagatcaggt <u>ggatcc</u> TCATATCCAGCCGGATGGG        |
| Pull-down assay | GST-G1-F (BamHI)            | gatctggttccgcgt <u>ggatcc</u> ATGTCGTCGTCGTCCGCTGC      |
|                 | GST-G1-R (Sall)             | gatgcggccgctcgagt <u>cgac</u> CTAACTGAAGGTGTTGTACAGAAAT |
|                 | His-G1-F (BamHI)            | gccatggctgatatc <u>ggatcc</u> ATGTCGTCGTCGTCCGCTGC      |
|                 | His-G1-R (Sall)             | tgcggccgcaagctt <u>gtcgac</u> CTAACTGAAGGTGTTGTACAGAAAT |
|                 | GST-OsMADS1-F (BamHI)       | gatctggttccgcgt <u>ggatcc</u> ATGGGGAGGGGGAAGGTG        |
|                 | GST-OsMADS1-R (Sall)        | gatgcggccgctcgagt <u>cgac</u> TCATATCCAGCCGGATGGG       |
