# Supplementary material for: G1 Interacts with OsMADS1 to Regulate the Development of the Sterile Lemma in Rice
Source: MDPI journal article supplement (doi:10.3390/plants13040505), 2024-02-11
Supplement: s1 [file s1]

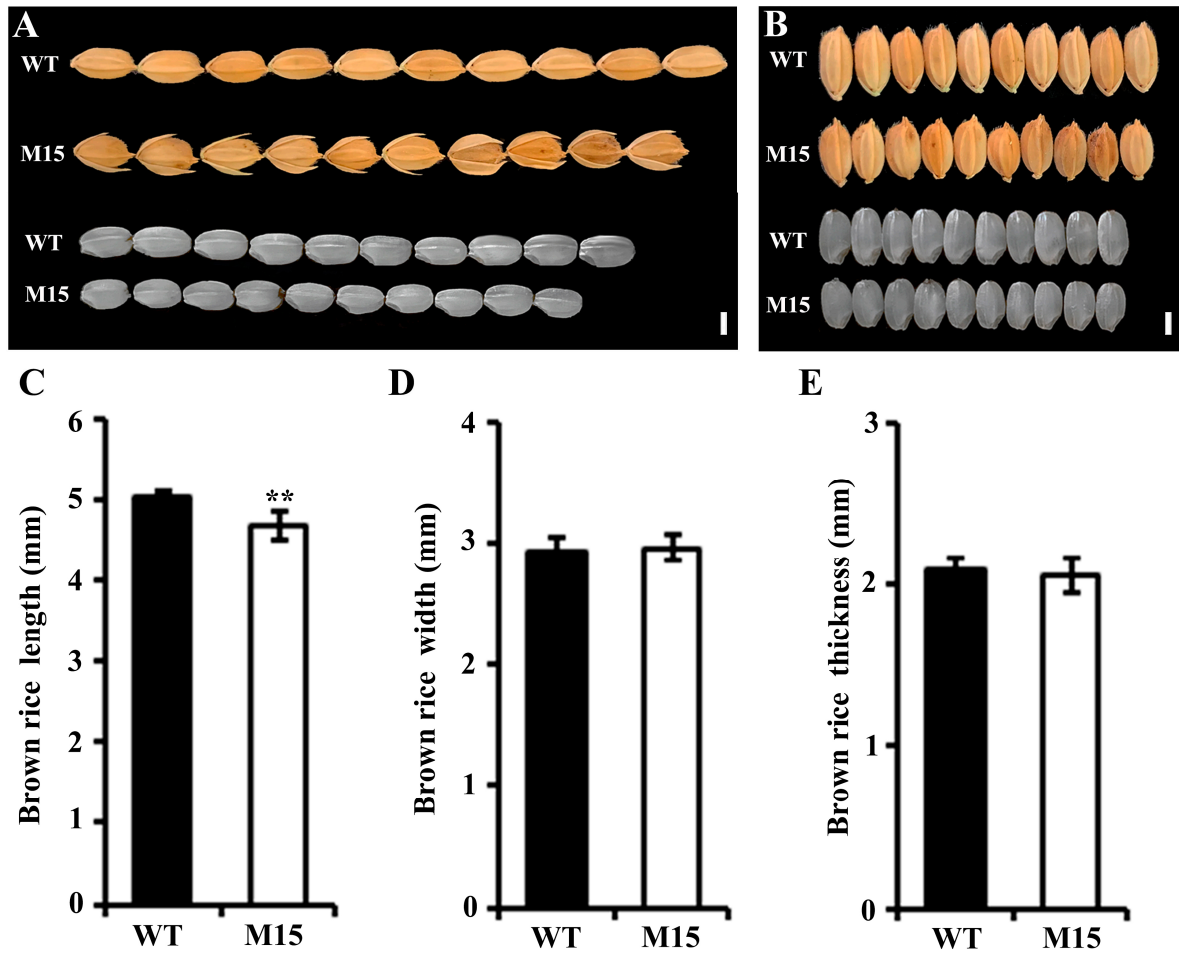

**Supplemental Figure S1. Phenotypes of WT and M15 seeds.** (A, B) Morphologies of grains (above ) and brown rice (below) of WT and M15. (C-E): Quantification of brown rice length (C), width (D), and thickness (E) of WT and M15. Scale bars = 2 mm (A, B). Data represent means and standard errors ( $n = 20$ ). Data analysed by t-test, \*\* showed extremely significant difference ( $p < 0.01$ ).

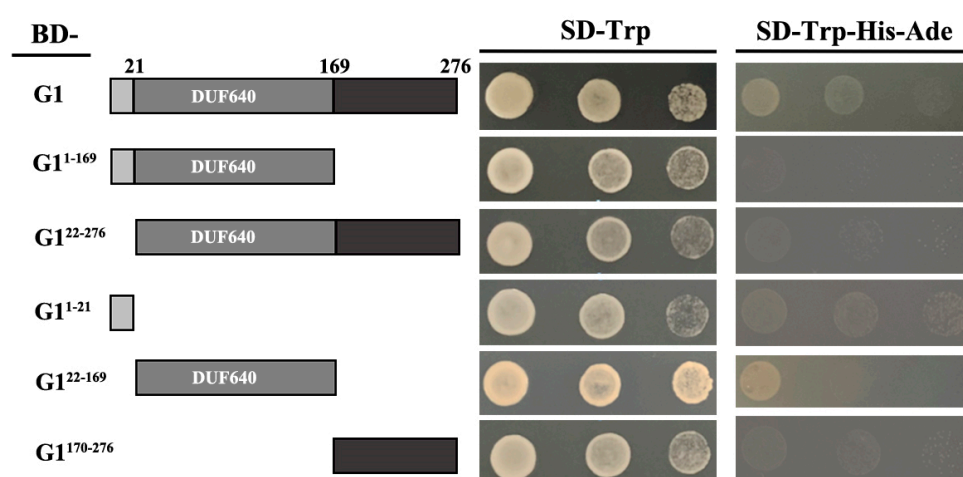

**Supplemental Figure S2. The transcriptional activation assay of G1 and truncated G1 in yeast cells.**

|                                           |                                             |       |
|-------------------------------------------|---------------------------------------------|-------|
| <b>G1(<i>Oryza sativa</i>)</b>            | AAAAAPCCPLRQAWGSLDALVGRIRAAAYDERH.GRAG..    | (276) |
| <i>Setaria italica</i>                    | .AAFEPCQCPLRQAWGSLDALVGRIRAAAFDERH.GARV..   | (256) |
| <i>Panicum miliaceum</i>                  | GSAAEPCCQCPLRQAWGSLDALVGRIRAAAFDERH.GARG..  | (257) |
| <i>Setaria viridis</i>                    | .AAFEPCQCPLRQAWGSLDALVGRIRAAAFDERH.GARV..   | (256) |
| <i>Hordeum vulgare</i>                    | ....AFCCQCPLRQAWGSLDALVGRIRAAAFDERH.SRSG..  | (260) |
| <i>Zea mays</i>                           | VEAAVAPCCQCPLRQAWGSLDALVGRIRAAAFDERH.GARG.. | (256) |
| <i>Digitaria exilis</i>                   | ...EAPCCQCPLRQAWGSLDALVGRIRAAAFDERH.GGGGAA  | (291) |
| <i>Triticum aestivum</i>                  | ....AFCCQCPLRQAWGSLDALVGRIRAAAFDERY.SRSV..  | (319) |
| <i>Sorghum bicolor</i>                    | LVAAAPCCQCPLRQAWGSLDALVGRIRAAAFDERH.GARGSG  | (271) |
| <i>Phragmites australis</i>               | .SPPAFRCPLRQAWGSLDALVGRIRAAAFDERH.GRPEA.    | (251) |
| <i>Zingiber officinale</i>                | .DFTSTCGCPLRQAWGSLDALVGRIRAAAYEESGSGTADT.   | (196) |
| <i>Musa acuminata</i>                     | .SPPAFRCPLRQAWGSLDALVGRIRAAAYEESG.GSPET.    | (200) |
| <i>Salix koriyanagi</i>                   | .NPPAFRCPLRQAWGSLDALVGRIRAAAFDERH.GKPEA.    | (196) |
| <i>Phalaenopsis equestris</i>             | .CPPGFRCPLRQAWGSLDALVGRIRAAAFDERH.GRPEA.    | (210) |
| <i>Actinidia chinensis</i>                | .RPPGFRCPLRQAWGSLDALVGRIRAAAYEESR.GQPEA.    | (192) |
| <i>Rhododendron vialii</i>                | .NPPAFRCPLRQAWGSLDALVGRIRAAAYEESR.GKPEA.    | (188) |
| <i>Ananas comosus</i>                     | .CPPAFRCPLRQAWGSLDALVGRIRAAAFDERH.GHFD.     | (243) |
| <i>Gossypium hirsutum</i>                 | .NPPAFRCPLRQAWGSLDALVGRIRAAAFDERH.GRPES.    | (235) |
| <i>Dendrobium catenatum</i>               | .CPPAFRCPLRQAWGSLDALVGRIRAAAFDERH.GEPEA.    | (203) |
| <i>Vitis vinifera</i>                     | .NPPAFRCPLRQAWGSLDALVGRIRAAAFDERH.GKPEA.    | (183) |
| <i>Rhynchospora pubera</i>                | .NPPAFRCPLRQAWGSLDALVGRIRAAAYEESR.GAFDS.    | (199) |
| <b>LSH1 (<i>Arabidopsis thaliana</i>)</b> | .NPPAFRCPLRQAWGSLDALVGRIRAAAYEESR.GPPEA.    | (190) |

**Supplemental Figure S3. Alignment of amino acid sequences of G1 protein mutation regions in different plant species.** Highly conserved residues are highlighted with same color background. The amino acid sequence in the red box indicates the mutation in the protein of M15 mutant.

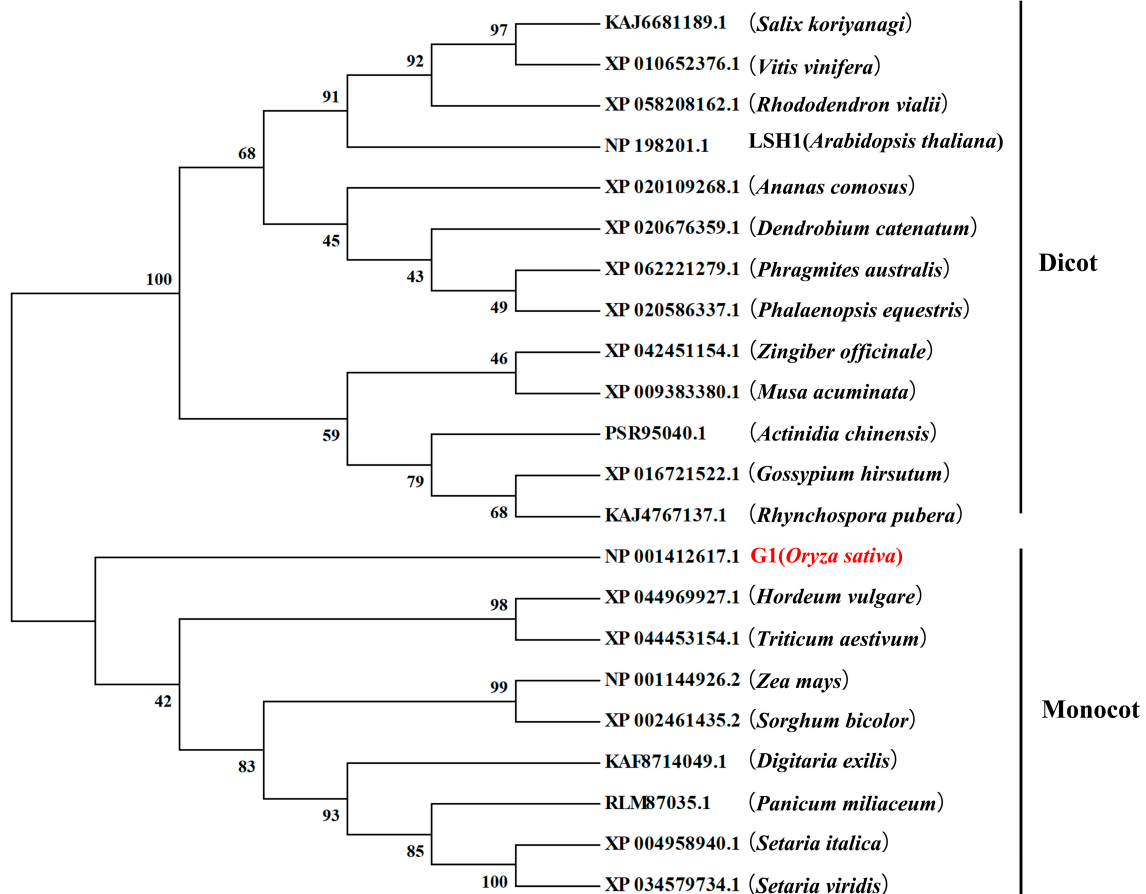

**Supplemental Figure S4. Phylogenetic analysis of G1 and its homologs.** The Neighbor-Join tree was constructed with MEGA5.0. The proteins are named according to their gene/EST names or NCBI accession numbers. Branch numbers represent a percentage of the bootstrap values in 1,000 sampling replicates.

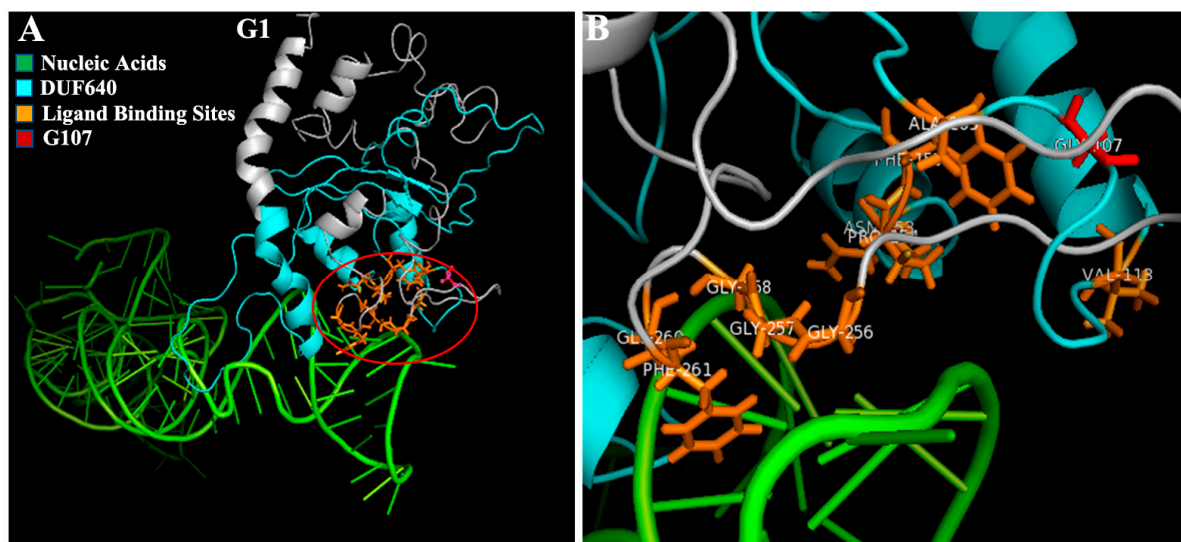

**Supplemental Figure S5. The protein structure analysis of G1.** (A): The prediction of G1 protein structure and ligand. (B): The key amino acid sites of G1 binding to DNA, including A105, V113, N153, P154, F155, G256, G257, G258, G260 and F261.
